# Supplementary material for: Pt-Based Nanostructures for Electrochemical Oxidation of CO: Unveiling the Effect of Shapes and Electrolytes
Source: MDPI journal article supplement (doi:10.3390/ijms232315034), 2022-11-30
Supplement: s1 [file s1]

# Supporting information

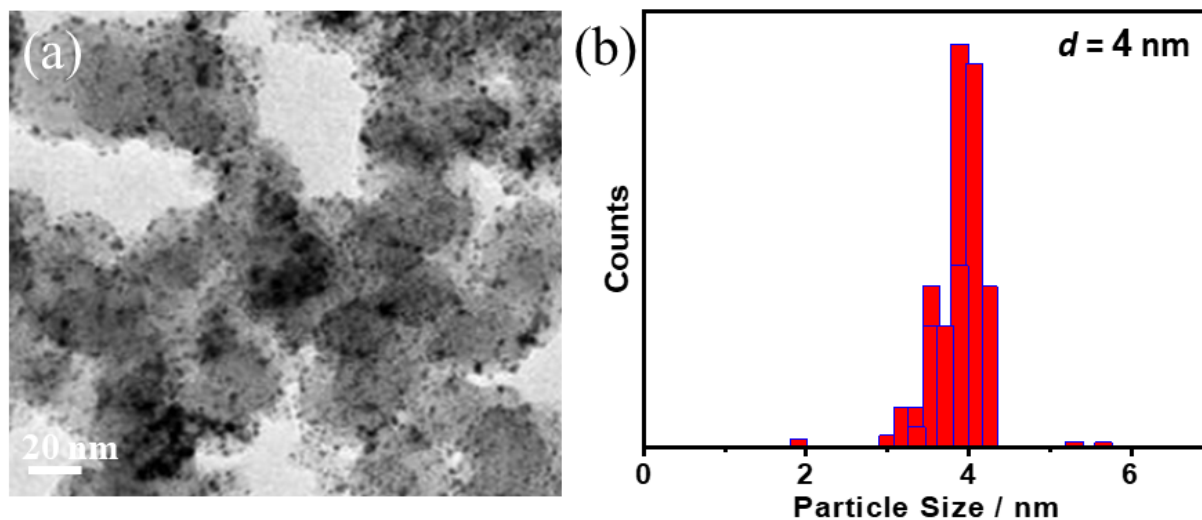

**Figure S1.** (a) TEM image of commercial and (b) histogram of particle size distribution of commercial Pt/C catalyst

**Table S1.** binding energies of Pt 4f in Pt PNDs, Pt NCs, and Pt/C catalysts.

| catalyst | Pt 4f <sub>7/2</sub> |                  | Pt 4f <sub>5/2</sub> |                  |
|----------|----------------------|------------------|----------------------|------------------|
|          | Pt <sup>0</sup>      | Pt <sup>2+</sup> | Pt <sup>0</sup>      | Pt <sup>2+</sup> |
| Pt NDs   | 71.31                | 72.2             | 74.66                | 75.55            |
| Pt NCs   | 71.24                | 72.1             | 74.55                | 75.45            |
| Pt/C     | 71.15                | 71.9             | 74.46                | 75.3             |

**Table S2.** The ECSA extracted from hydrogen under-potential adsorption/desorption (H-UPD) (ECSA<sub>H-UPD</sub>) and CO under under-potential adsorption (ECSA<sub>CO-UPD</sub>)

| Catalysts | HClO <sub>4</sub>                            |                                               | KOH                                          |                                               | Na <sub>2</sub> HCO <sub>3</sub>             |                                               |
|-----------|----------------------------------------------|-----------------------------------------------|----------------------------------------------|-----------------------------------------------|----------------------------------------------|-----------------------------------------------|
|           | ECSA <sub>H-UPD</sub><br>(m <sup>2</sup> /g) | ECSA <sub>CO-UPD</sub><br>(m <sup>2</sup> /g) | ECSA <sub>H-UPD</sub><br>(m <sup>2</sup> /g) | ECSA <sub>CO-UPD</sub><br>(m <sup>2</sup> /g) | ECSA <sub>H-UPD</sub><br>(m <sup>2</sup> /g) | ECSA <sub>CO-UPD</sub><br>(m <sup>2</sup> /g) |
| Pt NDs    | 59.1                                         | 34.23                                         | 66                                           | 30.71                                         |                                              | 19.52381                                      |
| Pt NCs    | 52.2                                         | 15.23                                         | 65.2                                         | 22.18                                         |                                              | 18.85714                                      |
| Pt/C      | 48.3/                                        | 14.38                                         | 52.5                                         | 18.28                                         |                                              | 11.2381                                       |

**Table S3.** Comparison of the electrochemical CO oxidation activities of our synthesized catalysts relative to previously reported catalysts.

| Catalyst                                | Medium / Scan rate / reference electrode                                | Maximum Current (mA/cm <sup>2</sup> ) / Voltage (V) | Ref      |
|-----------------------------------------|-------------------------------------------------------------------------|-----------------------------------------------------|----------|
| 60 wt % Pt/C                            | 0.5 H <sub>2</sub> SO <sub>4</sub><br>10 mV s <sup>-1</sup><br>SHE      | 0.2 mA cm <sup>-2</sup><br>0.64 V                   | [1]      |
| Well ordered Pt(111)                    | 0.1 M NaOH<br>50 mV/s<br>RHE                                            | 0.5 mA cm <sup>-2</sup><br>0.8 V                    | [2]      |
| PtNi multicubes                         | 1 M KOH<br>50 mV/s<br>RHE                                               | 0.58 mA cm <sup>-2</sup><br>0.65 V                  | [3]      |
| PtPd Nanodendrites                      | 1 M KOH<br>50 mV/s<br>Ag/AgCl                                           | 5.1 mA cm <sup>-2</sup><br>-0.15 V                  | [4]      |
| Pt dendrimer-encapsulated nanoparticles | 0.1m HClO <sub>4</sub><br>50 mV/s<br>Hg/Hg <sub>2</sub> SO <sub>4</sub> | 0.2 mA cm <sup>-2</sup><br>0.3 V                    | [5]      |
| Pt(110)-Ru                              | 0.5 M H <sub>2</sub> SO <sub>4</sub><br>100 mV/s<br>RHE                 | 0.025 mA<br>0.5 V                                   | [6]      |
| Pt/SnO <sub>x</sub>                     | 1 M HClO <sub>4</sub><br>20 mV s <sup>-1</sup><br>RHE                   | 0.87 mA cm <sup>-2</sup><br>0.7 V                   | [7]      |
| Pt-NbO <sub>x</sub>                     | 0.5 M H <sub>2</sub> SO <sub>4</sub><br>20 mV/s<br>RHE                  | 0.5 mA cm <sup>-2</sup><br>0.75 V                   | [8]      |
| Pt(FAM)                                 | 0.1 M H <sub>2</sub> SO <sub>4</sub><br>50 mV/s<br>RHE                  | 0.32 mA cm <sup>-2</sup><br>0.72 V                  | [9]      |
| PtRu@h-BN/C                             | 0.1 M H <sub>2</sub> SO <sub>4</sub><br>20 mV/s<br>RHE                  | 1.25 mA cm <sup>-2</sup><br>0.6 V                   | [10]     |
| Pt NDs                                  | 0.1 M HClO <sub>4</sub><br>50 mV/s<br>Ag/AgCl                           | 2.233 mA cm <sup>-2</sup><br>0.496 V                | Our work |
|                                         | 0.5 M Na <sub>2</sub> HCO <sub>3</sub><br>50 mV/s<br>Ag/AgCl            | 0.44mA cm <sup>-2</sup><br>0.18 V                   |          |
|                                         | 0.1 M NaOH<br>50 mV/s<br>Ag/AgCl                                        | 1.71mA cm <sup>-2</sup><br>-0.228 V                 |          |

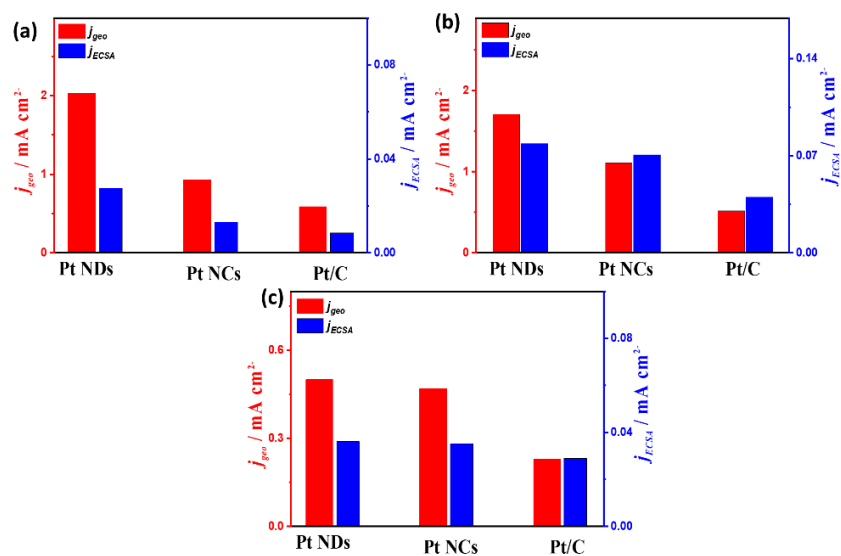

**Figure S2.** The current normalized by the electrode area ( $j_{geo}$ ) and ECSA ( $j_{ECSA}$ ) of different catalysts in (a) HClO<sub>4</sub>, (b) KOH, and (c) NaHCO<sub>3</sub> electrolytes

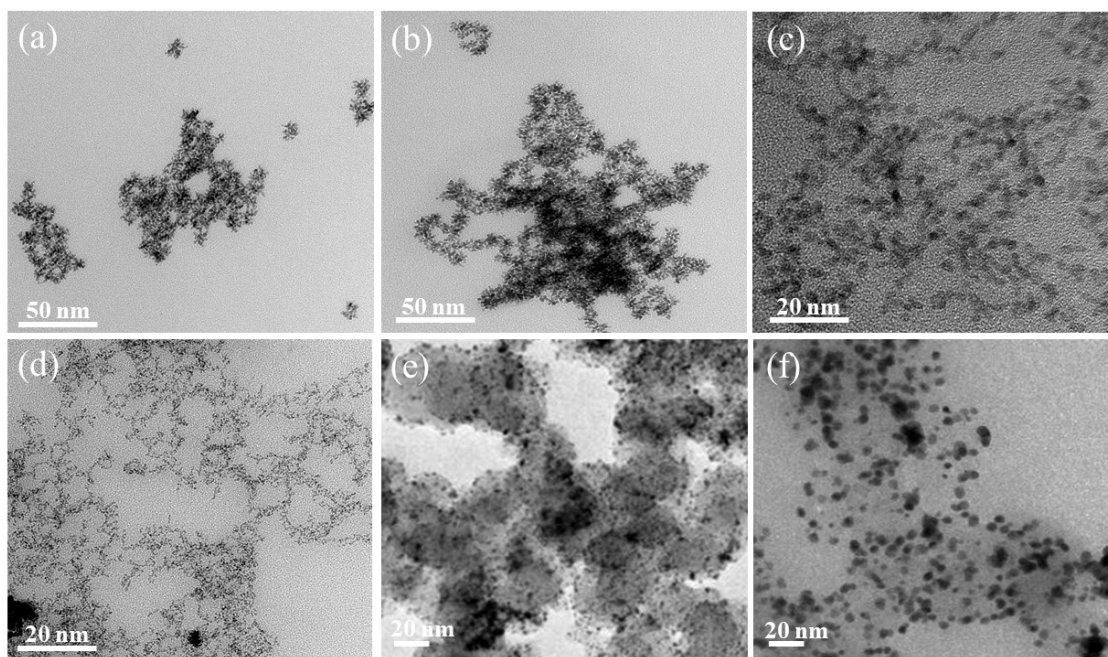

**Figure S3.** TEM image before and after stability tests of (a-b) Pt PNDs, (c-d) Pt NCs, and (e-f) Pt/C, respectively

## References

1. McPherson, I.J.; Ash, P.A.; Jones, L.; Varambhia, A.; Jacobs, R.M.; Vincent, K.A. Electrochemical CO oxidation at platinum on carbon studied through analysis of anomalous in situ IR spectra. *The Journal of Physical Chemistry C* **2017**, *121*, 17176-17187.
2. Spendelow, J.; Goodpaster, J.; Kenis, P.; Wieckowski, A. Mechanism of CO oxidation on Pt (111) in alkaline media. *The Journal of Physical Chemistry B* **2006**, *110*, 9545-9555.
3. Wu, F.; Eid, K.; Abdullah, A.M.; Niu, W.; Wang, C.; Lan, Y.; Elzatahry, A.A.; Xu, G. Unveiling one-pot template-free fabrication of exquisite multidimensional PtNi multicube nanoarchitectonics for the efficient electrochemical oxidation of ethanol and methanol with a great tolerance for CO. *ACS applied materials & interfaces* **2020**, *12*, 31309-31318.
4. Eid, K.; Ahmad, Y.H.; Yu, H.; Li, Y.; Li, X.; AlQaradawi, S.Y.; Wang, H.; Wang, L. Rational one-step synthesis of porous PtPdRu nanodendrites for ethanol oxidation reaction with a superior tolerance for CO-poisoning. *Nanoscale* **2017**, *9*, 18881-18889.
5. Weir, M.G.; Myers, V.S.; Frenkel, A.I.; Crooks, R.M. In situ X-ray absorption analysis of ~ 1.8 nm dendrimer-encapsulated Pt nanoparticles during electrochemical CO oxidation. *ChemPhysChem* **2010**, *11*, 2942-2950.
6. Davies, J.C.; Hayden, B.E.; Pegg, D.J. The electrooxidation of carbon monoxide on ruthenium modified Pt (110). *Electrochimica acta* **1998**, *44*, 1181-1190.
7. Matsui, T.; Fujiwara, K.; Okanishi, T.; Kikuchi, R.; Takeguchi, T.; Eguchi, K. Electrochemical oxidation of CO over tin oxide supported platinum catalysts. *Journal of power sources* **2006**, *155*, 152-156.
8. Ueda, A.; Yamada, Y.; Ioroi, T.; Fujiwara, N.; Yasuda, K.; Miyazaki, Y.; Kobayashi, T. Electrochemical oxidation of CO in sulfuric acid solution over Pt and PtRu catalysts modified with TaOx and NbOx. *Catalysis today* **2003**, *84*, 223-229.
9. Ciapina, E.G.; Santos, S.F.; Gonzalez, E.R. The electrooxidation of carbon monoxide on unsupported Pt agglomerates. *Journal of Electroanalytical Chemistry* **2010**, *644*, 132-143.
10. Sun, M.; Lv, Y.; Song, Y.; Wu, H.; Wang, G.; Zhang, H.; Chen, M.; Fu, Q.; Bao, X. CO-tolerant PtRu@ h-BN/C core-shell electrocatalysts for proton exchange membrane fuel cells. *Applied Surface Science* **2018**, *450*, 244-250.
